# Supplementary material
Source: publisher site journal article supplement (https://www.dovepress.com/article/308757)
Supplement: Supplementary file 1 [file get_supplementary_file.php]

**Supplementary file 1: Available data about the patients who died away from the ward**

| **Record** | **Age** | **Gender** | **Year of death** | **Diagnosis** |
| --- | --- | --- | --- | --- |
| 1 | - | Male | 1999 | Epilepsy-related psychosis |
| 2 | 27 | Female | 2000 | Schizophrenia |
| 3 | 28 | Female | 2000 | BAD |
| 4 | 37 | Female | 2000 | - |
| 5 | - | Female | 2001 | Depression |
